# Supplementary material for: UHPLC-ESI-QE-Orbitrap-MS based metabolomics reveals the antioxidant mechanism of icaritin on mice with cerebral ischemic reperfusion
Source: PeerJ. 2023 Jan 10;11:e14483. doi: 10.7717/peerj.14483 (PMC9838208; doi:10.7717/peerj.14483)
Supplement: Supplemental Information 2 [file peerj-11-14483-s002.xlsx]

## Sheet: infarct volume
	Sham	Model	ICT
	0	31.4	12.3
	0	33.2	15.6
	0	42.3	8.9
	0	38.9	11.2
	0	43.8	0
	0	41.5	11.7
	0		8.3
	0		0
	0
	0
		38.5167	9.95

## Sheet: brain water content
	Sham	Model	ICT
	76.5	80.5	78.9
	77.4	82.3	79.1
	75.8	81.2	77.5
	77.8	80.6	80.3
	76.3	79.5	78.9
	76.9	78.5	79.3
	76.8	79.4	77.5
	75.6	81.8	79.1
	78.1	80.9	80.2
	77.3	81.2	77.3

## Sheet:  neurological deficit
	Sham	Model	ICT
	0	2	2
	0	3	1
	0	4	1
	0	2	1
	0	3	1
	0	1	2
	0	4	1
	0	3	0
	0	2	1
	0	3	1
