# Supplementary material for: UHPLC-ESI-QE-Orbitrap-MS based metabolomics reveals the antioxidant mechanism of icaritin on mice with cerebral ischemic reperfusion
Source: PeerJ. 2023 Jan 10;11:e14483. doi: 10.7717/peerj.14483 (PMC9838208; doi:10.7717/peerj.14483)
Supplement: Supplemental Information 5 [file peerj-11-14483-s005.xlsx]

## Sheet: SOD
	Normal	Model	ICT
	158.25	135.82	186.86
	196.16	168.91	138.43
	213.25	174.34	192.39
	185.17	221.18	225.51
	199.02	124.14	213.31
	204.35	138.26	183.76
	213.18	156.08	179.52
	278.26	159.91	158.31
	205.15	121.35	199.01
	254.02	162.66	221.62
average	210.681	156.265	189.872
s	33.7892	29.341	27.3114
p		0.00118548	0.0162464

## Sheet: MDA
	Normal	Model	ICT
	4.88	7.31	6.55
	3.21	8.46	9.74
	3.52	8.35	5.41
	5.76	9.19	4.89
	3.37	9.53	7.78
	3.95	6.92	3.65
	4.19	7.67	7.12
	3.28	7.25	6.42
	3.66	6.29	5.37
	3.56	12.43	4.31
average	3.938	8.34	6.124
s	0.813167	1.75746	1.79788
p		1.08555e-06	0.0121644

## Sheet: GSH-Px
	Normal	Model	ICT
	32.31	13.27	21.36
	35.17	25.02	19.81
	28.96	12.58	28.63
	40.23	17.62	16.38
	25.42	14.31	33.25
	28.17	9.86	15.99
	33.65	15.31	36.18
	24.68	13.25	28.36
	36.07	16.62	22.18
	34.22	12.41	27.17
average	31.888	15.025	24.931
s	4.97502	4.15658	6.87835
p		1.64567e-07	0.00105458

## Sheet: CAT
	Normal	Model	ICT
	52.03	28.91	29.66
	46.18	32.45	37.13
	35.24	18.95	36.28
	33.18	34.13	28.68
	40.23	28.66	35.42
	36.25	30.31	43.14
	39.19	22.16	30.25
	45.66	25.38	41.16
	39.87	26.91	35.36
	42.03	32.03	27.28
average	40.986	27.989	34.436
s	5.70873	4.76421	5.35542
p		3.00804e-05	0.010764
